# Supplementary material
Source: PubMed Central journal article supplement (PMC7147284)
Supplement: rli-55-257-s001.pdf [file rli-55-257-s001.pdf]

# Investigative Radiology

## Chest CT Findings in Patients with Corona Virus Disease 2019 and its Relationship with Clinical Features --Manuscript Draft--

|                                            |                                                                                                                                                                                                                                                                                                                                                                                                                                                                                                                                                                                                                                                                                                                                                                                                                                                                                                                                                                                                                                                                                                                                                                                                                                                                                                                                                                                                                                                                                                                                                                                                                                                                                                                                                                                                                                                                                                                                                                                                                                                                                         |
|--------------------------------------------|-----------------------------------------------------------------------------------------------------------------------------------------------------------------------------------------------------------------------------------------------------------------------------------------------------------------------------------------------------------------------------------------------------------------------------------------------------------------------------------------------------------------------------------------------------------------------------------------------------------------------------------------------------------------------------------------------------------------------------------------------------------------------------------------------------------------------------------------------------------------------------------------------------------------------------------------------------------------------------------------------------------------------------------------------------------------------------------------------------------------------------------------------------------------------------------------------------------------------------------------------------------------------------------------------------------------------------------------------------------------------------------------------------------------------------------------------------------------------------------------------------------------------------------------------------------------------------------------------------------------------------------------------------------------------------------------------------------------------------------------------------------------------------------------------------------------------------------------------------------------------------------------------------------------------------------------------------------------------------------------------------------------------------------------------------------------------------------------|
| <b>Manuscript Number:</b>                  | IR-D-20-00109R1                                                                                                                                                                                                                                                                                                                                                                                                                                                                                                                                                                                                                                                                                                                                                                                                                                                                                                                                                                                                                                                                                                                                                                                                                                                                                                                                                                                                                                                                                                                                                                                                                                                                                                                                                                                                                                                                                                                                                                                                                                                                         |
| <b>Full Title:</b>                         | Chest CT Findings in Patients with Corona Virus Disease 2019 and its Relationship with Clinical Features                                                                                                                                                                                                                                                                                                                                                                                                                                                                                                                                                                                                                                                                                                                                                                                                                                                                                                                                                                                                                                                                                                                                                                                                                                                                                                                                                                                                                                                                                                                                                                                                                                                                                                                                                                                                                                                                                                                                                                                |
| <b>Article Type:</b>                       | Original Article                                                                                                                                                                                                                                                                                                                                                                                                                                                                                                                                                                                                                                                                                                                                                                                                                                                                                                                                                                                                                                                                                                                                                                                                                                                                                                                                                                                                                                                                                                                                                                                                                                                                                                                                                                                                                                                                                                                                                                                                                                                                        |
| <b>Keywords:</b>                           | SARS-CoV-2, COVID-19, Infection, Pneumonia, Chest CT                                                                                                                                                                                                                                                                                                                                                                                                                                                                                                                                                                                                                                                                                                                                                                                                                                                                                                                                                                                                                                                                                                                                                                                                                                                                                                                                                                                                                                                                                                                                                                                                                                                                                                                                                                                                                                                                                                                                                                                                                                    |
| <b>Corresponding Author:</b>               | Chuanming Li, M.D<br>the Second Affiliated Hospital of Chongqing Medical University<br>Chongqing, China CHINA                                                                                                                                                                                                                                                                                                                                                                                                                                                                                                                                                                                                                                                                                                                                                                                                                                                                                                                                                                                                                                                                                                                                                                                                                                                                                                                                                                                                                                                                                                                                                                                                                                                                                                                                                                                                                                                                                                                                                                           |
| <b>First Author:</b>                       | Jiong Wu, MS                                                                                                                                                                                                                                                                                                                                                                                                                                                                                                                                                                                                                                                                                                                                                                                                                                                                                                                                                                                                                                                                                                                                                                                                                                                                                                                                                                                                                                                                                                                                                                                                                                                                                                                                                                                                                                                                                                                                                                                                                                                                            |
| <b>First Author Secondary Information:</b> |                                                                                                                                                                                                                                                                                                                                                                                                                                                                                                                                                                                                                                                                                                                                                                                                                                                                                                                                                                                                                                                                                                                                                                                                                                                                                                                                                                                                                                                                                                                                                                                                                                                                                                                                                                                                                                                                                                                                                                                                                                                                                         |
| <b>Order of Authors:</b>                   | Jiong Wu, MS<br>Xiaojia Wu, MS<br>Chuanming Li, MD<br>Wenbing Zeng, MS<br>Dajing Guo, MD<br>Fang Zheng, MS<br>Linli Chen, MS<br>Huizhe Huang, MD                                                                                                                                                                                                                                                                                                                                                                                                                                                                                                                                                                                                                                                                                                                                                                                                                                                                                                                                                                                                                                                                                                                                                                                                                                                                                                                                                                                                                                                                                                                                                                                                                                                                                                                                                                                                                                                                                                                                        |
| <b>Manuscript Region of Origin:</b>        | CHINA                                                                                                                                                                                                                                                                                                                                                                                                                                                                                                                                                                                                                                                                                                                                                                                                                                                                                                                                                                                                                                                                                                                                                                                                                                                                                                                                                                                                                                                                                                                                                                                                                                                                                                                                                                                                                                                                                                                                                                                                                                                                                   |
| <b>Abstract:</b>                           | <p><b>Objectives:</b> To investigate the chest computed tomography (CT) findings in patients with confirmed corona virus disease 2019 (COVID-19) and to evaluate its relationship with clinical features.</p> <p><b>Materials and Methods:</b> Study sample consisted of 80 patients diagnosed as COVID-19 from January to February 2020. The chest CT images and clinical data were reviewed and the relationship between them was analyzed.</p> <p><b>Results:</b> Totally 80 patients diagnosed with COVID-19 were included. With regards to the clinical manifestations, 58/80 (73%) of patients had cough, 61/80 (76%) of patients had high temperature levels. The most frequent CT abnormalities observed were ground glass opacity (GGO) (73/80 cases, 91%), consolidation (50/80 cases, 63%) and interlobular septal thickening (47/80, 59%). Most of the lesions were multiple, with an average of 12±6 lung segments involved. The most common involved lung segments were the dorsal segment of the right lower lobe (69/80, 86%), the posterior basal segment of the right lower lobe (68/80, 85%), the lateral basal segment of the right lower lobe (64/80, 80%), the dorsal segment of the left lower lobe (61/80, 76%) and the posterior basal segment of the left lower lobe (65/80, 81%). The average pulmonary inflammation index (PII) value was (34%±20%) for all the patients. Correlation analysis showed that the PII value was significantly correlated with the values of lymphocyte count, monocyte count, C-reactive protein, procalcitonin, days from illness onset and body temperature (p&lt;0.05).</p> <p><b>Conclusion:</b> The common chest CT findings of COVID-19 are multiple GGO, consolidation and interlobular septal thickening in both lungs, which are mostly distributed under the pleura. There are significant correlations between the degree of pulmonary inflammation and the main clinical symptoms and laboratory results. CT plays an important role in the diagnosis and evaluation of this emerging global health emergency.</p> |

Dear Dr. Val M. Runge,

Thank you very much for your letter and advice. We also appreciate the constructive criticisms of the reviewers. This letter explains the changes made to the manuscript ‘ Chest CT Findings in Patients with 2019 Novel Coronavirus Infection and its Relationship with Clinical Features’ (No. IR-D-20-00109) in response to comments by the reviewers. A point-by-point summary of all revisions is at the end of this letter.

We hope that the revision is acceptable, and I look forward to hearing from you soon.

With best wishes,

Yours sincerely,

We would like to express our sincere thanks to the reviewers for the constructive and positive comments.

## Replies to Reviewer 1

**Q.1** In this submission to Investigative Radiology the authors analyzed typical imaging pattern of pulmonary disease associated with SARS-CoV-2 infection / COVID-19. The authors included 80 patients with proven infection recently examined with chest CT. This is a very hot topic and the manuscript provides valuable data for the radiologic / medical community.

However, there are some points needing revision before a decision. In general, I would recommend a cross check of the manuscript by a native speaker .

**Answer:** A cross check of the manuscript has been made by a native speaker in the revised version.

**Q.2** Title: I suggest using the most recent names/definitions provided by the WHO for the 2019 novel coronavirus, namely "SARS-CoV-2" and the associated disease, namely "COVID-19", here and throughout the manuscript.

**Answer:** The names/definitions for the novel coronavirus have been revised according to the reviewer's suggestions.

**Q.3** Key words: As for the title, also include "SARS-CoV-2" and "COVID-19" in the key words..

**Answer:** The key words have been revised according to the reviewer's suggestions.

### Q.4 Introduction

Page 3, second paragraph: "The common signs of people infected..." consider revision such as "Common clinical symptoms of patients infected with SARS-CoV-2 include fever,..."

"Severe patients usually have..." -> "In severe cases patients present with ..."

"There has been rare study about..." -> "Up to the present there is only limited data available regarding the typical chest CT imaging findings in COVID-19..."

**Answer:** The sentences have been revised according to the reviewer's suggestions (Line 55-56, 59-62, 62-63).

### Q.5 Page 4:

Inclusion criteria:

Consider language revision providing a more concise description of the inclusion criteria.

**Answer:** The language and including criteria have been revised according to the reviewer's suggestions (Line 73-79).

**Q.6** Explain what you mean with "high spatial frequency algorithm". Provide information regarding the convolution kernel and window setting used for reconstruction of image data.

**Answer:** "High spatial frequency algorithm" should be "High spatial resolution algorithm". Information regarding the convolution kernel and window setting used for the reconstruction of image data has been added in the revised version (Line, 99-105).

### Q.7 Page 5/6

Pulmonary inflammation index: As this score is crucial for the statistical evaluation give a

more detailed explanation of the score assessment. I suggest giving an example, based on the imaging findings / case included.

**Answer:** An example of pulmonary inflammation index has been added in Figure 1 in the revised version.

#### **Q.8 Results**

Page 6: Characteristics and clinical manifestation

"None of them was children or pregnant women." -> "None of them were..."

Maybe the authors should move this to the exclusion criteria, i.e. "No children or pregnant women were included in this study".

Be more precise regarding the immunosuppression. What was the underlying cause?

Be more precise regarding the heart disease present in one patient.

**Answer:** This sentence have been revised and moved to the exclusion criteria (Line 80-82). The underlying causes of immunosuppression were immunosuppressive drugs taking. The heart disease was coronary heart disease. We have made it clear in the revised version (Line 138-139).

#### **Q.9 Page 7:**

Indicate if the blood gas analysis was done from arterial blood samples.

Chest CT findings

"All 80 patients were examined by chest CT in 7 ±4 days from..." -> "All patients were examined by chest CT 7+/- 4 days after the onset of disease"

" The major CT abnormalities... " -> "The most frequent CT abnormalities observed..."

**Answer:** All the blood gas analysis was done from arterial blood samples (Line 96). We have made it clear in the revised version. The sentences have been revised according to the reviewer's suggestions (Line 159, 13-15).

#### **Q.10 Page 9:**

"The incidence of expectoration, chest pain, muscle ache, abdominal pain or diarrhea, pharyngeal discomfort, headache or dizziness and dyspnea were not popular."

Revise!

"...were less common" or "...occurred less frequently".

"On the whole, the CT changes of the lung were significantly heavier than the clinical manifestations" -> "In our study population, pulmonary manifestation of COVID-19 as

Revise!

**Answer:** The sentences have been revised according to the reviewer's suggestions (Line 196-198; 203-205).

**Q.11** "In our study population, pulmonary manifestation of COVID-19 as depicted by chest CT was worse than the clinical situation of the patient would suggest"

However, this statement is sort of contradictive to your statement later on, where you write that there is a significant correlation between the pulmonary changes and the symptoms as well as the lab results. In addition, the correlation coefficients do indicate a rather poor correlation in part.

Comment on this and revise the manuscript being more concise.

Also consider my comment regarding the references, Discuss the stage of the disease in context of your imaging time point.

I would even argue in a different way. If you have rather mild symptoms and severe pulmonary changes on CT, this might be indicative for COVID-19. Thus, CT might be a useful tool to quickly identify high risk patients.

**Answer:** Compared with other types of pneumonia, COVID-19 seemed to cause milder symptoms and severer pulmonary changes on CT. For example, most of the patients had mild symptoms and mild temperature rise, but their lung manifestations were serious. For different COVID-19 patients, the changes of lung function showed significant correlations with their symptoms and laboratory test results. We have revised it to be more concise (Line 204-205). Our imaging time points and disease stages have been discussed in the revision (Line, 229-239).

**Q.12** Page 10, second paragraph: Typo "...the the...." and "...the pulmonary interstitium have been involved" -> "has been involved"

Page 11, second paragraph: "...we found the common chest CT findings of 2019-ncov infection are multiple GGO....," -> "...we found that common chest CT findings in COVID-19 include multiple GGO,...., with mostly subpleural distribution"

"...involving only a relative small sample subjects" -> "...involving a small number of patients with proven SARS-CoV-2 infection"

**Answer:** The sentences have been revised according to the Reviewer's suggestions (Line 246-247, 257-259, 262-264).

### **Q.13** References

Make sure to include some brand new publications (i.e. published in Radiology) in the reference list dealing with this topic, when submitting your revised manuscript.

In particular, there is one paper published regarding the time course of changes on chest CT. Here, you could discuss how your patients / image data fit into the stage of the disease / the clinical symptoms.

**Answer:** Several new publications have been added in the revised version (Line 217-218, 229-237). The paper published regarding the time course of changes on chest CT and our data of imaging time points and disease stages have been discussed in the revised version (Line, 229-239).

### **Q.14**

Figures

In general, I would suggest including sagittal or coronal reformations of the cases / or at least one our two. This would give an overview of the craniocaudal gradient of the pulmonary changes.

Figure 1

Avoid cropping the lung at the anterior part of the chest! This is a lung disease and thus the parenchyma should be display in a whole.

Figure legends:

Very sparse! Include some clinical information of the corresponding patients! This would make the cases more attractive.

**Answer:** The Figures and Figure legends have been revised according to the reviewer's suggestions.

### **Replies to Reviewer 2**

**Q.1** After the authors have submitted this manuscript, the WHO named this disease as Coronavirus disease 2019 (COVID-19).

**Answer:** All the names have been corrected in the revised version.

**Q.2** The mortality of COVID-19 seems to be higher in the Wuhan area. Therefore, the

authors need to describe this study is from the Wuhan area or outside the Wuhan area.

**Answer:** This study is from outside of the Wuhan area. We have made it clear in the revised version (Line 69-70).

**Q.3** Patients: What were the indications of chest CT? What proportion of patients who were RT-PCR positive underwent chest CT?

**Answer:** All the patients who were RT-PCR positive underwent chest CT (Line, 79).

**Q.4** CT scans and review (page 5): Reference 7 needs to be replaced with a more recent Fleischner Society Glossary (Hansell DM, et al. Radiology 2008).

**Answer:** Reference 7 has been replaced in the revised version.

**Q.5** Chest CT findings (page 7): The authors suggested a new sign, spider web sign, in describing CT findings of COVID-19. However, it is not clear about the clinical significance of this sign. Is this a specific sign for COVID-19 or does this have any prognostic value?

**Answer:** Spider web sign is a specific sign for COVID-19, which has not been reported in other diseases in the literature. At present, it is not clear whether it has clinical value in evaluating the prognosis of patients (Line 227-229).

**Q.6** Chest CT findings (page 7): Procalcitonin can be used in identifying serious bacterial infections. However, in this study, the PII value was significantly correlated with procalcitonin. Does this mean some patients had secondary bacterial infections? How many patients had secondary infections?

**Answer:** In our study, bacteria were found in blood or sputum cultures of 11 patients, most of whom were severe or critical cases. In fact, previous study have found that procalcitonin could be increased in patients with COVID-19 (Wang D, Hu B, Hu C, et al. JAMA. 2020. doi:10.1001/jama).

**Q.7** Chest CT findings (page 7): How was body temperature evaluated in the correlation analysis? As a continuous variable or categorical variable as presented in Table 1?

**Answer:** The body temperature was evaluated as a continuous variable in the correlation analysis. We have made it clear in the revised version (Line 184).

# Chest CT Findings in Patients with Corona Virus Disease 2019 and its Relationship with Clinical Features

*Jiong Wu, MS ¶<sup>1</sup> Xiaojia Wu, MS ¶<sup>2</sup> Wenbing Zeng, MS<sup>1</sup> Dajing Guo, MD<sup>2</sup> Zheng Fang,  
MS<sup>2</sup> Linli Chen, MS<sup>2</sup> Huizhe Huang, MD<sup>3</sup> Chuanming Li, MD\*<sup>2</sup>*

1. Department of Radiology, Chongqing Three Gorges Central Hospital, Chongqing, China
2. Department of Radiology, the Second Affiliated Hospital of Chongqing Medical University, Chongqing, China
3. Office of Academic Research, The Second Affiliated Hospital of Chongqing Medical University, Chongqing, China

¶ These authors contributed equally to this work.

\* Corresponding author: Chuanming Li, MD, Department of Radiology, The Second Affiliated Hospital of Chongqing Medical University, No. 74 Linjiang Rd, Yuzhong District, Chongqing, 400010, China. Email: [lichuanming@hospital.cqmu.edu.cn](mailto:lichuanming@hospital.cqmu.edu.cn)

Conflicts of interest and sources of funding: This work is funded by the Natural Science Foundation of China (31771619).

Running head: Chest CT findings in patients with COVID-19

1 Chest CT Findings in Patients with Corona Virus Disease  
2 ~~2019~~ 2019 Novel Coronavirus Infection and its Relationship  
3 with Clinical Features  
4

5 **Abstract**

6 **Objectives:** To investigate the chest computed tomography (CT) findings in patients  
7 with confirmed corona virus disease 2019 (COVID-19) ~~novel coronavirus~~  
8 ~~(SARS-CoV-2) 2019 novel coronavirus (2019-nCoV) infection~~ and to evaluate its  
9 relationship with clinical features.

10 **Materials and Methods:** Study sample consisted of 80 patients ~~who had been~~  
11 diagnosed as COVID-19 ~~2019-nCoV infection~~ from January to February 2020 ~~were~~  
12 ~~included~~. The chest CT images and clinical data were reviewed and the relationship  
13 ~~between~~ of them was analyzed.

14 **Results:** Totally 80 patients diagnosed with COVID-19 ~~as 2019-nCoV infection~~ were  
15 included. With regards to the clinical manifestations, 58/80 (73%) of patients had  
16 cough, 61/80 (76%) of patients had high temperature levels. The most frequent CT  
17 abnormalities observed ~~The major CT abnormalities observed~~ were ground glass  
18 opacity (GGO) (73/80 cases, 91%), consolidation (50/80 cases, 63%) and interlobular  
19 septal thickening (47/80, 59%). Most of the lesions were multiple, with an average of  
20  $12 \pm 6$  lung segments involved. The most common involved lung segments were the  
21 dorsal segment of the right lower lobe (69/80, 86%), the posterior basal segment of  
22 the right lower lobe (68/80, 85%), the lateral basal segment of the right lower lobe



23 (64/80, 80%), the dorsal segment of the left lower lobe (61/80, 76%) and the posterior  
24 basal segment of the left lower lobe (65/80, 81%). The average pulmonary  
25 inflammation index (PII) value was (34% ± 20%) for all the patients. Correlation  
26 analysis showed that the PII value was significantly correlated with the values of  
27 lymphocyte count, monocyte count, C-reactive protein, procalcitonin, days from  
28 illness onset and body temperature (p<0.05).

29 **Conclusion:** The common chest CT findings of ~~COVID-19 SARS-CoV-2 2019 novel~~  
30 ~~infection~~ are multiple GGO, consolidation and interlobular septal thickening in both  
31 lungs, which are mostly distributed under the pleura. There are significant correlations  
32 between the degree of pulmonary inflammation and the main clinical symptoms and  
33 laboratory results. CT plays an important role in the diagnosis and evaluation of this  
34 emerging global health emergency.

35 **Key words:** ~~SARS-CoV-2, COVID-19, 2019 novel coronavirus,~~ Infection,  
36 ~~Pneumonia, Chest CT~~

37

## 38 Introduction

39 Since the middle of December 2019, many cases of pneumonia with  
40 ~~unknown~~ unidentified causes have been found in some hospitals in Wuhan City, Hubei  
41 Province, China.<sup>1</sup> At first, it was reported that ~~many a number of~~ patients had ~~some~~  
42 ~~connection~~ certain contact with a large seafood and animal market, ~~suggesting which~~  
43 suggested an animal-to-human ~~animal-to-human~~ transmission. Soon afterwards, ~~more~~

44 ~~and more~~ an increasing number of patients without ~~being exposing~~ exposed to the  
45 animal market ~~were found~~ started to grow exponentially, indicating a fact of  
46 human-to-human transmission ~~that human to human transmission is taking place~~. At  
47 present, ~~this kind of pneumonia~~ has been confirmed as a new type of acute  
48 respiratory infectious disease caused by coronavirus infection.<sup>2,3</sup> However, it is not  
49 clear how ~~expeditiously and sustainably~~ easy and sustainable the virus ~~is to~~  
50 ~~spread~~ spreads from person to person. On 12 February, 2020, the International  
51 Committee on Taxonomy of Viruses (ICTV) announced that the official classification  
52 of the new coronavirus was severe acute respiratory syndrome coronavirus 2  
53 (SARS-CoV-2). The same day, the World Health Organization (WHO) announced the  
54 ~~same day~~ that the official name of the disease caused by the virus is corona virus  
55 disease 2019 (COVID-19) ~~On January 12, 2020, the World Health Organization~~  
56 ~~(WHO) named it as 2019 Novel Coronavirus (2019-nCoV)~~ or officially named by the  
57 World Health Organization as coronavirus disease 2019 (COVID-19), and the  
58 ~~pneumonia caused by this pathogen was called new coronavirus pneumonia~~. The  
59 ~~Since then, it~~ Corona Virus has been spreading rapidly around the world, infecting no  
60 fewer than thirtyseveny thousands people ~~causing more than thirty thousands of~~  
61 ~~patients~~, and leading to a certain degree of public panic.<sup>4-6</sup> On January 30, 2020, the  
62 International Health Regulations Emergency Committee of the WHO declared the  
63 outbreak a “public health emergency of international concern” (PHEIC).  
64 The epidemic caused by the new coronavirus has become a public health emergency  
65 of international concern.

66 The ~~novel coronavirus (SARS-CoV-2019-ncov)~~ is a new strain of coronavirus  
67 which has never been found in human body before. Common clinical symptoms of  
68 patients infected with SARS-CoV-2 include fever ~~The common signs of people~~  
69 ~~infected with it are fever,~~ fatigue and dry cough. ~~A~~ Besides, a small number of patients  
70 could have nasal congestion, runny nose, sore throat or diarrhea. Furthermore, in  
71 some aggravated cases ~~In some serious cases, infection can lead~~ has led to severe acute  
72 respiratory syndrome, renal failure, and even death. In severe cases patients present  
73 with ~~Severe patients usually have~~ dyspnea and / or hypoxemia one week after the  
74 onset of the disease, and develop rapidly into acute respiratory distress syndrome,  
75 septic shock, metabolic acidosis and coagulation dysfunction which are ~~difficult~~  
76 ~~arduous~~ hard to correct. Up to the present there is only limited data available regarding  
77 the typical chest CT imaging findings in COVID-19 ~~There has been rare study about~~  
78 ~~the chest CT findings in patients with 2019-ncov infection in the literature.~~ In this  
79 study, we retrospectively evaluated the chest CT findings in 80 patients with  
80 confirmed COVID-19 ~~SARS-CoV-2019-ncov infection~~ and ~~to~~ evaluate ~~its~~ their  
81 relationship with the clinical features.

82

## 83 **Materials and Methods**

### 84 **Patients**

85 The present study sample consisted of 80 patients who had been diagnosed as  
86 COVID-19 ~~SARS-CoV-2019-ncov infection~~ in our hospitals, (outside of the Wuhan  
87 area) from January to February 2020 ~~were included in the present study.~~ This study

Formatted

Formatted

88 received Ethics Committee approval of our institutions. ~~The, and the~~ committees  
89 waived the need for individual consent ~~because of~~ due to the retrospective nature of  
90 the study. The inclusion criteria were: 1. epidemiological history -either  
91 travel/residence history in Wuhan or exposure history to febrile patients from Wuhan  
92 suffering from respiratory symptoms~~with respiratory symptoms from Wuhan~~ within  
93 14 days before the onset of illness; 2. laboratory diagnosis - 1) real-time fluorescence  
94 polymerase chain reaction revealed positive detection of SARS-CoV-2 in throat swabs  
95 or lower respiratory tract; 2) the virus gene sequencing of respiratory or blood  
96 samples is highly homologous with the known SARS-CoV-2. All Patients~~the patients~~  
97 underwent thin-section CT at least one time. A) Have an epidemiological history; B)  
98 Having one of the following etiological evidences: 1) Real time RT-PCR detection of  
99 2019-nCoV nucleic acid positive in respiratory or blood samples; 2) The virus gene  
100 sequencing of respiratory or blood samples is highly homologous with the known new  
101 coronavirus; . C) Patients who underwent CT examinations. The exclusion criteria  
102 were another confirmed concomitant pulmonary pneumonia ~~infection~~ or coronavirus  
103 infection. Children and pregnant women were also excluded #from this study

104 Clinical and laboratorial data were obtained from a detailed medical records  
105 collected respectively in standardized form~~record~~ by two radiologists with 10 and  
106 8 years ~~of~~ experience, ~~respectively, using a standardized form.~~ The following clinical  
107 data of the patients were assessed: gender, age, cough, expectoration, chest pain,  
108 muscle ache, abdominal pain or diarrhea, pharyngeal discomfort, dyspnea, dizziness  
109 or headache, blood in sputum, and presence of comorbidities (including systemic

Formatted

110 hypertension, diabetes mellitus, tobacco smoke, asthma, heart disease, chronic  
111 obstructive pulmonary disease (COPD), immunodeficiency, and others. Information  
112 regarding the physical examination at admission was also evaluated, including the  
113 heart rate (HR), body temperature, oxygen saturation, and blood pressure (BP).  
114 ~~Regarding~~Moreover, the laboratory data obtained at admission, which included the  
115 leukocyte, lymphocyte, neutrophil, monocyte, procalcitonin, and C-reactive protein  
116 (CRP), were assessed as well. Blood gas ~~analyses~~analysis were performed in 40  
117 patients. ~~Their~~ whose PH value, PaCO<sub>2</sub> and PaO<sub>2</sub> were also assessed. All the blood  
118 gas analysis was conducted from arterial blood samples.

119

## 120 **CT scans and Review**

121 The CT examinations were ~~performed~~carried out with an 16-row multidetector CT  
122 scanner (Siemens Somatom Sensation; Siemens, Erlangen, Germany) using the  
123 following parameters: 120 kVp, 150 mA, 1.5 mm collimation, 1.35:1 pitch, sharp  
124 kernel smoothing (B80f), and reconstruction matrix of 512×512, slice thickness of  
125 1.0mm, and high spatial resolution algorithm. All the patients were scanned in a  
126 supine position during breath-holding at full inspiration. ~~Thin-section CT images were~~  
127 ~~reconstructed with 1.0 mm collimation with a high spatial resolution algorithm~~high  
128 ~~spatial frequency algorithm~~. All CT images were evaluated using a lung window, with  
129 a window level of -500 HU and window width of 1500 HU. Two certified chest  
130 radiologists with 10 and 8 years ~~of~~ experience independently reviewed the CT  
131 images while they. ~~They~~ were blinded to the names and clinical data of the patients.

132 The CT imaging features were fully assessed and the following findings were  
133 highlighted: ground glass opacity (GGO), consolidation, interlobular septal thickening,  
134 bronchial wall thickening, subpleural line, lymph node enlargement, pleural effusion  
135 and pericardial effusion in accordance with the standard morphologic descriptors  
136 based on the Fleischner Society Nomenclature Committee recommendations and  
137 similar studies.<sup>7,8</sup> ~~As a rule, a~~ consensus had to be reached between the 2  
138 radiologists about the abnormalities, ~~and discrepancies were reconciled and tackled~~  
139 ~~via. Discrepancies were solved by~~ discussion. ~~Specificly,~~ the evaluation of the size  
140 and extent of lung involvement was based on the segments of the lung anatomy: 10  
141 segments in the right lung and 10 segments in the left lung (2 segments were  
142 considered in the apicoposterior segment of the left upper lobe and 2 segments were  
143 considered in the inferior front segment of the left lower lobe). According to the  
144 evaluation criterion established by Chongqing Radiologist Association of China, the  
145 pulmonary inflammation index (PII) was obtained from each patient.  $PII =$   
146  $(\text{Distribution score} + \text{Size score}) / 40 * 100\%$  (Fig.1). Distribution score: ~~scored score~~  
147 according to the lesion distribution, one score for each lung segment, and 20 scores  
148 for left and right lung. Lesion size score: ~~scored score~~ according to whether the lesion  
149 ~~occupies~~ occupied more than 50% of the lung segment volume, one score for  $\geq 50\%$ ,  
150 and zero score for  $< 50\%$ . Spearman's correlations were performed to evaluate the  
151 relationships between the PII value and the clinical symptom and laboratory results of  
152 the patients. All Statistical Analysis was ~~performed~~ conducted using Statistical  
153 Package for Social Sciences software version 23.0 (SPSS Inc., Chicago, IL, USA). P

154 values less than 0.05 were considered statistically significant.

155

## 156 **Results :**

### 157 **Characteristics and clinical manifestations**

158 This study included 80 patients diagnosed as [COVID-19 SARS-CoV-2 2019-nCoV](#)  
159 [infection](#), of which 42 were male (52%) and 38 were female (48%). [All the patients](#)  
160 aged 15-79 years with an average age of  $44 \pm 11$  years. 26/80 (33%) [of](#) patients were  
161 smokers. 61/80 (76%) [of](#) patients had high temperature levels. 15/80 (18%) [of](#) patients  
162 had comorbidities, 4/80 (5%) [of](#) patients had hypertension, 4/80 (5%) [of](#) patients had  
163 diabetes, 3/80 (4%) [of](#) patients had COPD, 3/80 (3%) [of](#) patients had  
164 immunosuppression ([immunosuppressive drugs taking](#)), 1/80 (1%) [of](#) patients had  
165 heart disease ([coronary heart disease](#)). No patients had asthma or other chronic lung  
166 disease. With regards to the clinical manifestations, 58/80 (73%) [of](#) patients had  
167 cough, 11/80 (14%) [of](#) patients had expectoration, 5/80 (6%) [of](#) patients had chest  
168 pain, 13/80 (16%) [of](#) patients had muscle ache, 7/80 (9%) [of](#) patients had abdominal  
169 pain or diarrhea, 9/80 (11%) [of](#) patients had pharyngeal discomfort, 8/80 (10%) [of](#)  
170 patients had dizziness or headache, 7/80 (9%) [of](#) patients had dyspnea and 3/80 [of](#)  
171 patients (4%) had blood in sputum. On physical examination [stastics](#), the median  
172 oxygen saturation was 97% (IQR: 96%-98%), the average heart rate was  $88.24 \pm$   
173  $11.67$  bpm and the respiratory rate was  $21.05 \pm 3.74$  breaths/min. The average  
174 systolic BP was  $123.46 \pm 14.19$  mmHg, and the diastolic BP was  $80.00 \pm$

175 14.04 mmHg. Regarding the laboratory data, the median leukocyte count was 5.40  
176 (IQR: 4.20-6.95) ( $\times 10^9/L$ ), lymphocyte count was 1.15 (IQR: 0.76-1.40) ( $\times 10^9/L$ ),  
177 monocyte count was 0.41 (IQR: 0.27-0.53) ( $\times 10^9/L$ ), neutrophil count was 3.74 (IQR:  
178 2.67-5.20) ( $\times 10^9/L$ ), respectively. The median C-reactive protein was 12.39 (IQR:  
179 2.71-50.60) (mg/L) and the procalcitonin was 0.04 (IQR: 0.03-0.07) (ng/mL). Blood  
180 gas analysis were performed in 40 patients. The average PH value was  $7.45 \pm 0.02$ ,  
181  $PaCO_2$  (mmHg) was  $39.21 \pm 7.25$ , and  $PaO_2$  (mmHg) was  $85.72 \pm 22.11$ . The clinical  
182 manifestations and laboratory findings were shown in Table 1 [and](#) 2.

183

#### 184 **Chest CT findings**

185 ~~All patients were examined by chest CT 7 ± 4 days after the onset of disease.~~ All 80  
186 ~~patients were examined by chest CT in 7 ± 4 days from the onset of the disease.~~ In  
187 chest CT images, 76/80 cases (95%) of the patients had abnormalities indicating the  
188 pneumonia. The major CT abnormalities observed were GGO ([ground glass opacity](#))  
189 (73/80 cases, 91%), consolidation (50/80 cases, 63%) and interlobular septal  
190 thickening (47/80, 59%) ([Fig. 1](#)). ~~Besides that,~~ 9/80 (11%) [of](#) patients had bronchial  
191 wall thickening, 16/80 (20%) [of](#) patients had subpleural line, 5/80 (6%) [of](#) patients  
192 had pleural effusion, 3/80 (4%) [of](#) patients had lymph node enlargement, 4/80 (5%) [of](#)  
193 patients had pericardial effusion. The characteristic signs were “crazy paving sign”  
194 (23/80, 29%) and “spider web sign” (20/80, 25%) (~~Figure~~ [Fig. 2, 3](#)). The “crazy  
195 paving pattern” was characterized by the reticular interlobular septa thickening within  
196 the patchy GGO, which had been reported in Severe Acute Respiratory Syndrome



197 (SARS) literatures.<sup>9,10</sup> The “spider web sign” was the first time we found and named  
198 it. It showed a triangular or angular GGO under the pleura with the internal  
199 interlobular septa thickened like a net. The adjacent pleura was pulled and formed a  
200 spiderweb-like shape~~is pulled and looks like a spider's web~~ in the corner. Most of the  
201 lesions were multiple, with an average of  $12 \pm 6$  lung segments involved. The lesions  
202 showed subpleural distribution in 42/80 cases (53%), diffuse distribution in 7/80 cases  
203 (9%), peribronchial distribution in 3/80 cases (4%) and mixed distribution in 24/80  
204 cases (30%). The most common involved lung segments were the dorsal segment of  
205 the right lower lobe (69/80, 86%), the posterior basal segment of the right lower lobe  
206 (68/80, 85%), the lateral basal segment of the right lower lobe (64/80, 80%), the  
207 dorsal segment of the left lower lobe (61/80, 76%) and the posterior basal segment of  
208 the left lower lobe (65, 81%). The average PII value was ( $34\% \pm 20\%$ ) for all the  
209 patients. Correlation analysis showed that the PII value was significantly correlated  
210 with the values of lymphocyte count, monocyte count, C-reactive protein,  
211 procalcitonin, days from illness onset and body temperature (continuous variable)  
212 ( $p < 0.05$ ). The correlation coefficient values were -.260, -.258, .373, .273, .287, .544  
213 respectively. The chest CT findings of the patients were shown in Table 3.

214

## 215 Discussion

216 COVID-19 SARS-CoV-2 2019-nCoV infection, which is primarily transmitted by  
217 contact between people and droplets, turns out to be a new disease of human beings

218 ~~a new disease of human beings, which is transmitted mainly by contact between~~  
219 ~~people and droplets.~~ Whether the novel coronavirus can spread in other ways is  
220 unclear, although it could be detected in nasopharyngeal swabs, sputum, lower  
221 respiratory secretions, blood, feces and other samples. Early identification and early  
222 intervention are ~~the key~~ vital to reduce the incidence and mortality of severe cases. In  
223 this study, most patients were adults and there was no significant difference between  
224 the numbers of either male ~~and~~ female. Cough and fever were the most common  
225 clinical symptoms. The incidence of expectoration, chest pain, muscle ache,  
226 abdominal pain or diarrhea, pharyngeal discomfort, headache or dizziness and  
227 dyspnea ~~were less common~~ ~~were not popular~~. This is similar to other types of  
228 coronavirus infections such as the SARS and Middle East Respiratory Syndrome  
229 (MERS).<sup>11-13</sup> ~~This implies that they can presumably be classified as~~ indicating that they  
230 ~~may belong to~~ the same kind of infection and the target cells of  
231 ~~SARS-CoV-2019-nCoV~~ may also be located in the lower respiratory tract.

232 For chest CT, 76 cases (95%) had abnormalities indicating the pneumonia. On the  
233 whole, ~~the CT changes of the lung were significantly heavier than the clinical~~  
234 ~~manifestations in comparison with~~ compared with other types of pneumonia,  
235 COVID-19 seemed to cause milder symptoms and severer pulmonary changes on CT.  
236 Most of the patients had mild symptoms and mild temperature rise, but their lung  
237 manifestations were serious. Multiple lesions were found in multiple segments and  
238 lobes of both lungs, which was different from the bacterial pneumonia. In other words,  
239 multiple ~~Multiple~~ and large lesions of two lungs involved simultaneously ~~at the same~~

240 ~~time~~ is not ~~generally spotted~~~~popular~~ in the typical bacterial pneumonia.<sup>14,15</sup> The most  
241 common involved lung segments were the dorsal segment of the right lower lobe, the  
242 posterior basal segment of the right lower lobe, the lateral basal segment of the right  
243 lower lobe, the dorsal segment of the left lower lobe and the posterior basal segment  
244 of the left lower lobe. There were significant correlations ~~among~~~~between~~ the degree of  
245 pulmonary inflammation and the main clinical symptoms and laboratory results. Our  
246 results suggested that chest CT could be used to evaluate the severity of the disease  
247 and ~~plays~~~~played~~ an important role in clinical practice. For CT features, GGO was the  
248 most common of all the abnormalities, followed by consolidation and interlobular  
249 septal thickening. This is consistent with the results of the recently published  
250 studies.<sup>16-18</sup> ~~Occasionally~~~~Sometimes~~ the subpleural line and bronchial wall thickening  
251 could be seen. ~~Pleural~~ ~~whereas~~ ~~pleura~~ effusion, pericardial effusion or lymph node  
252 enlargement ~~were rare to identify~~~~was rare~~. Some of the GGO was characterized by the  
253 reticular interlobular septa thickening, which ~~is~~ ~~was~~ called "crazy paving pattern". It  
254 resulted from the alveolar edema and interstitial inflammatory of acute lung injury,  
255 which had ~~be~~~~been~~ reported in SARS.<sup>9,10</sup> In another situation, some of the GGO  
256 showed a triangular or angular shape under the pleura with the internal interlobular  
257 septa thickened like a net. The adjacent pleura ~~is pulled and looks like a spider's web~~  
258 was pulled and formed a spiderweb-like shape in the corner. Thus we named it "spider  
259 web sign". But the pathological basis needs further pathological confirmation. It is a  
260 specific sign for COVID-19, which has not been reported in other diseases in the  
261 literature. At present, it is not clear whether it has clinical value in evaluating the

262 prognosis of patients. Recently, Pan et al have analyzed the time course of lung  
263 changes in 21 mild patients with confirmed COVID-19. They found that the initial  
264 lung manifestation was subpleural GGO which turned to consolidation two weeks  
265 after the onset of the disease, and then the lesions were gradually absorbed, leaving a  
266 wide range of GGO and subpleural parenchymal bands.<sup>17</sup> In another article, the  
267 authors found that after 7 days of treatment for the mild patients, there was a  
268 significant reduction in GGO on chest CT. On the 13th day after admission, most of  
269 the ground glass disappeared. Our patients constituted a complete group with mild,  
270 severe and critical types.<sup>19</sup> All patients completed CT examination within two days  
271 after admission, which was  $7 \pm 4$  days from the onset of the disease.

272 At present, to our knowledge, all patients have not been examined by pathology  
273 in the world, so it is impossible to know the exact pathological manifestations of  
274 COVID-19. However, according~~According~~ to the morphological changes of the CT  
275 features, pathological manifestations could be speculated although there ~~is~~was no  
276 direct evidence. The ground glass density lesions could be caused by the exudation of  
277 alveoli. The appearance of consolidation ~~indicates~~indicated that the alveoli ~~were~~are  
278 completely filled by inflammatory exudation. The thickening of interlobular septum  
279 ~~indicated~~indicates that the the pulmonary interstitium ~~has~~have been involved. In the  
280 late stage of acute respiratory distress syndrome, diffuse alveolar and interstitium  
281 damage may ~~occured~~occur.

282 The ~~COVID-19~~SARS-CoV-2 ~~2019-nCoV~~ infection needs to be differentiated  
283 from other diseases, such as SARS and MERS. They all showed multiple ground

284 glass shadows and solid lesions in both lungs, mainly distributed under the pleura,  
285 which were difficult to distinguish.<sup>16-18,20-22</sup> However, SARS and MERS had faster  
286 disease progress and heavier lung damages~~have faster and heavier disease progress~~  
287 ~~and lung damage~~ than COVID-19SARS-CoV-2 2019-ncov infection did. ~~On the other~~  
288 ~~hand~~ Likewise, COVID-19 should be distinguished~~differentiated~~ from other kinds of  
289 viral pneumonia such as influenza virus, parainfluenza virus, adenovirus, respiratory  
290 syncytial virus, rhinovirus, human metapneumovirus and mycoplasma pneumonia.

291 In conclusion, in this study, we found ~~that~~that common chest CT findings ~~of~~in  
292 COVID-19SARS-CoV-2 2019-ncov ~~infection~~ ~~are~~were~~include~~ multiple GGO,  
293 consolidation and interlobular septal thickening in both lungs, with mostly subpleural  
294 distribution~~which are~~with mostly distributed under the pleura. There ~~are~~were  
295 significant correlations ~~between~~among the degree of pulmonary inflammation and the  
296 main clinical symptoms and laboratory results. CT played an important role in the  
297 diagnosis and evaluation of this emerging global health emergency. Nevertheless, this  
298 This study has ~~several~~three limitations. First of all, this ~~is~~was a retrospective study  
299 involving a small number of patients with proven SARS-CoV-2  
300 infection~~COVID-19~~~~involving only a relative small sample subjects~~. Secondly, none of  
301 the patients had a lung biopsy or autopsy to reflect the histopathological changes.  
302 Thirdly, this study ~~is~~was a cross-sectional study and we could not analyze the  
303 dynamic CT changes in different stages. In the future work we will investigate the  
304 chest CT features of differential stages of COVID-19SARS-CoV-2 2019-ncov  
305 infection by using larger, more diverse samples.

306

307 **Reference**

308 1. WHO. Novel coronavirus - China. Jan 12, 2020. Available at:

309 <https://www.who.int/csr/don/12-january-2020-novel-coronavirus-china/en/>.

310 ~~Accessed Jan 19, 2020.~~

311 2. Chaolin H, Yeming W, Xingwang L, et al. *The lancet*, Published Online January

312 24, 2020. [https://doi.org/10.1016/S0140-6736\(20\)30183-5](https://doi.org/10.1016/S0140-6736(20)30183-5).

313 3. Huang C, Wang Y, Li X, et al. Clinical features of patients infected with 2019

314 novel coronavirus in Wuhan, China. *Lancet*, 2020. doi:

315 10.1016/S0140-6736(20)30183-5.

316 4. WHO. Novel coronavirus - Japan (ex-China). Jan 17, 2020. Available at:

317 [http://www.who.int/csr/don/17-january-2020-novel-coronavirus-japan-ex-china/en](http://www.who.int/csr/don/17-january-2020-novel-coronavirus-japan-ex-china/en/)

318 ~~/ . Accessed Jan 19, 2020.~~

319 5. WHO. Novel coronavirus - Republic of Korea (ex-China). Jan 21, 2020.

320 Available at:

321 <http://www.who.int/csr/don/21-january-2020-novelcoronavirus-republic-of-korea>

322 ~~-ex-china/en/ . Accessed Jan 23, 2020.~~

323 6. CDC. First travel-related case of 2019 novel coronavirus detected in United

324 States. Jan 21, 2020. Available at:

325 <https://www.cdc.gov/media/releases/2020/p0121-novel-coronavirus-travel-case.ht>

326 ~~ml. Accessed Jan 23, 2020.~~

327 7. Hansell DM, Bankier AA, MacMahon H, et al. Fleischner Society: glossary of

- 328 [terms for thoracic imaging. \*Radiology\*. 2008; 246: 697-722.](#)
- 329 ~~7. Austin JH, Muller NL, Friedman PJ, et al. Glossary of terms for CT of the lungs:~~  
330 ~~recommendations of the Nomenclature Committee of the Fleischner~~  
331 ~~Society. *Radiology*. 1996; 200: 327-331.~~
- 332 8. Karla S, Natally H, et al. Spectrum of clinical and radiographic findings in  
333 patients with diagnosis of H1N1 and correlation with clinical severity. *BMC*  
334 *Infect Dis*. 2019; 19: 964.
- 335 9. Ketai L, Paul NS, Wong KT. Radiology of Severe Acute Respiratory Syndrome  
336 (SARS): the Emerging Pathologic-Radiologic Correlates of an Emerging Disease.  
337 *J Thorac Imaging*. 2006; 21(4):276-283.
- 338 10. Wong KT, Antonio GE, Hui DS, et al. Thin-Section CT of Severe Acute  
339 Respiratory Syndrome: evaluation of 74 Patients Exposed to or with the Disease.  
340 *Radiology*. 2003; 228(2): 395-400.
- 341 11. Lee N, Hui D, Wu A, et al. A major outbreak of severe acute respiratory  
342 syndrome in Hong Kong. *N Engl J Med*. 2003; 348:1986-1994.
- 343 12. Assiri A, Al-Tawfiq JA, Al-Rabeeh AA, et al. Epidemiological, demographic,  
344 and clinical characteristics of 47 cases of Middle East respiratory syndrome  
345 coronavirus disease from Saudi Arabia: a descriptive study. *Lancet Infect Dis*.  
346 2013; 13: 752-761.
- 347 13. Muller NL, Ooi GC, Khong PL, et al. High-resolution CT findings of severe  
348 acute respiratory syndrome at presentation and after admission. *Am J*  
349 *Roentgenol*. 2004; 182:39-44.

- 350 14. Gharib AM, Stern E. Radiology of pneumonia. *Medical Clinics of North*  
351 *America*. 2001; 85: 1461-1491.
- 352 [15.](#) Koo HJ, Lim S, Choe J, et al. Radiographic and CT Features of Viral Pneumonia.  
353 *Radiographics*. 2018; 38:719-739.
- 354 [16.](#) Song FX, Shi NN, Zhang ZY, et al. Emerging Coronavirus 2019-nCoV  
355 *Pneumonia. Radiology*. 2020:200274. doi:10.1148/radiol.2020200274.
- 356 [17.](#) Pan F, Yan TH, Sun P, et al. Time Course of Lung Changes On Chest CT During  
357 *Recovery From 2019 Novel Coronavirus (COVID-19) Pneumonia. Radiology*.  
358 *2020:200370. doi:10.1148/radiol.2020200370.*
- 359 [18.](#) Jeffrey K. Chest CT Findings in 2019 Novel Coronavirus (2019-nCoV) Infections  
360 *from Wuhan, China: Key Points for the Radiologist. Radiology*. 2020:200241.  
361 *doi:10.1148/radiol.2020200241.*
- 362 ~~15.~~[19.](#) Duan YN, Qin J. Pre- and Posttreatment Chest CT Findings: 2019 Novel  
363 *Coronavirus (2019-nCoV) Pneumonia. Radiology*. 2020:200323.  
364 *doi:10.1148/radiol.2020200323.*
- 365 ~~16.~~[20.](#) Das KM, Lee EY, Enani MA, et al.  
366 CT correlation with out- comes in 15 patients with acute Middle  
367 East respiratory syndrome coronavirus. *AJR*. 2015; 204: 736-742.
- 368 ~~17.~~[21.](#) Ajlan AM, Ahyad RA, Jamjoom LG, et al. Middle East Respiratory Syndrome  
369 Coronavirus (MERS-CoV) Infection: Chest CT Findings. *AJR*. 2014; 203:  
370 782-787.
- 371 ~~18.~~[22.](#) Hui DS, Memish ZA, Zumla A. Severe acute respiratory syndrome vs. the



372 Middle East respiratory syndrome. *Curr Opin Pulm Med.* 2014; 20: 233-421.

373

374

375

376

377

378

379

380

381

382

383

384

385

386

387

388

389

390

391

392

393

394

395 Table 1: Characteristics and clinical manifestations ~~of them~~ 80 patients with  
 396 [COVID-19](#) ~~2019-nCoV~~ infection.

| <b>Patients (n=80)</b>    |                     |
|---------------------------|---------------------|
| <b>Characteristics</b>    |                     |
| Age, years                | 44 (11)             |
| Sex                       |                     |
| Female                    | 38 (48%)            |
| Male                      | 42 (52%)            |
| Smokers                   | 26 (33%)            |
| Days from illness onset   | 7 (4)               |
| Comorbidity               | 15 (18%)            |
| Hypertension              | 4 (5%)              |
| Diabetes                  | 4 (5%)              |
| COPD                      | 3 (4%)              |
| Immunosuppression         | 3 (3%)              |
| Heart disease             | 1 (1%)              |
| Asthma                    | 0 (0%)              |
| <b>Signs and symptoms</b> |                     |
| Fever                     | 61 (76%)            |
| Highest temperature, °C   | 37.80 (37.30-38.20) |
| <37.30                    | 19 (24%)            |
| 37.30–38.00               | 38 (47%)            |

|                             |          |
|-----------------------------|----------|
| 38.10–39.00                 | 20 (25%) |
| >39.00                      | 3 (4%)   |
| Cough                       | 58 (73%) |
| Expectoration               | 11 (14%) |
| Chest pain                  | 5 (6%)   |
| Muscle ache                 | 13 (16%) |
| Dyspnoea                    | 7 (9%)   |
| Abdominal pain and diarrhea | 7 (9%)   |
| Pharyngeal discomfort       | 9 (11%)  |
| Dizziness and headache      | 8 (10%)  |
| Blood in sputum             | 3 (4%)   |

397 Data are n (%), n/N (%), mean (SD), where N is the total number of patients with  
398 available data. [COVID-19](#)~~2019-nCoV~~ = [Corona Virus Disease 2019](#) ~~2019-novel~~  
399 ~~coronavirus~~. COPD = Chronic obstructive pulmonary disease.

400

401

402

403

404

405

406

407

408 Table 2: Laboratory and physical examination results ~~in~~of the 80 patients with  
 409 [COVID-19 SARS-CoV-2](#) ~~2019-nCoV~~ infection.

|                                         | <b>Patients (n=80)</b> |
|-----------------------------------------|------------------------|
| White blood cell count, $\times 10^9/L$ | 5.40 (4.20-6.95)       |
| Increased                               | 10 (10%)               |
| Decreased                               | 7 (9%)                 |
| Neutrophil count, $\times 10^9/L$       | 3.74 (2.67-5.20)       |
| Increased                               | 16 (20%)               |
| Decreased                               | 5 (6%)                 |
| Lymphocyte count, $\times 10^9/L$       | 1.15 (0.76-1.40)       |
| Decreased                               | 34 (43%)               |
| Monocyte count, $\times 10^9/L$         | 0.41 (0.27-0.53)       |
| Increased                               | 8 (10%)                |
| Decreased                               | 1 (1%)                 |
| C-reactive protein (mg/L)               | 12.39 (2.71-50.61)     |
| Increased                               | 37 (46%)               |
| Procalcitonin (ng/mL)                   | 0.04 (0.03-0.07)       |
| Increased                               | 32 (40%)               |
| Heart rate (bpm)                        | 88.24 (11.67)          |
| Respiratory rate (breaths/min)          | 21.05 (3.74)           |
| Systolic pressure (mm Hg)               | 123.46 (14.19)         |
| Diastolic pressure (mm Hg)              | 80.00 (14.04)          |

|                               |               |
|-------------------------------|---------------|
| SaO <sub>2</sub> , % room air | 97% (96%-98%) |
| PH value*                     | 7.45 (0.02)   |
| PaCO <sub>2</sub> (mmHg) *    | 39.21 (7.25)  |
| PaO <sub>2</sub> (mmHg) *     | 85.73 (22.11) |

410 Data are n (%), n/N (%), mean (SD) or and median (IQR), where N is the total  
411 number of patients with available data. Increasing means exceeding the upper limit of  
412 the normal range, and decreasing means being below the lower limit of the normal  
413 range. [COVID-19](#)~~2019-nCoV~~= [Corona Virus Disease 2019](#)~~2019-nCoV~~ ~~novel coronavirus~~.  
414 SaO<sub>2</sub> = Arterial oxygen saturation. PH = Potential of hydrogen. PaCO<sub>2</sub> = Arterial  
415 partial pressure of carbon dioxide. PaO<sub>2</sub> = Arterial oxygen tension. \*Data available for  
416 40 patients.

417  
418  
419  
420  
421  
422  
423  
424  
425  
426  
427

428

429 Table 3: Chest CT findings ~~in~~ of the 80 patients with430 [COVID-19](#) ~~SARS-CoV-2~~ ~~2019-nCoV~~ infection.

| <b>Patients (n=80)</b>                          |          |
|-------------------------------------------------|----------|
| <b>CT features</b>                              |          |
| GGO                                             | 73 (91%) |
| Consolidation                                   | 50 (63%) |
| Interlobular septal thickening                  | 47 (59%) |
| Crazy paving pattern                            | 23 (29%) |
| Spider web sign                                 | 20 (25%) |
| Subpleural line                                 | 16 (20%) |
| Bronchial wall thickening                       | 9 (11%)  |
| Lymph node enlargement                          | 3 (4%)   |
| Pericardial effusion                            | 4 (5%)   |
| Pleural effusion                                | 5 (6%)   |
| <b>Lung segment involved</b>                    |          |
| Average lung segments involved                  | 12 (6)   |
| Dorsal segment of the right lower lobe          | 69 (86%) |
| Lateral basal segment of the right lower lobe   | 64 (80%) |
| Posterior basal segment of the right lower lobe | 68 (85%) |
| Dorsal segment of the left lower lobe           | 61 (76%) |
| Posterior basal segment of the left lower lobe  | 65 (81%) |

|                            |           |
|----------------------------|-----------|
| PII value                  | 34% (20%) |
| <b>Distribution</b>        | 76 (95%)  |
| Subpleural distribution    | 42 (53%)  |
| Diffuse distribution       | 7 (9%)    |
| Peribronchial distribution | 3 (4%)    |
| Mixed distribution         | 24 (30%)  |

---

431 Data are n (%), n/N (%) or mean (SD), where N is the total number of patients with

432 available data. [COVID-19= Corona Virus Disease 2019](#). GGO = ground glass opacity.

433 PII = pulmonary inflammation index.

434

435

436

437

438 **FIGURE 1. A-C.** Chest CT of a 38 years old male. The clinical manifestations were  
439 fever (38 °C), cough, expectoration, muscle pain and dyspnea. C-reactive protein and  
440 procalcitonin increased. Ground glass opacity (GGO) (white triangle), consolidation  
441 (white thick arrow) and interlobular septal thickening (white thin arrow) distributed  
442 under the pleura were seen. Nine lung segments including the lateral basal segment,  
443 posterior basal segment, posterior basal segment, anterior basal segment of the both  
444 lower lobe, and the dorsal segment of the left inferior lobe were involved. In three  
445 segments the lesions occupied more than 50% of the total volume.  $PII = (9+3)/40$   
446  $*100\% = 30\%$ .

447



448

449 **FIGURE 2.** A-C, Chest CT of a 60 years old male. The clinical manifestations were  
450 fever (37.8 °C), cough, expectoration and dyspnea. Neutrophil count, lymphocyte  
451 count and C-reactive protein increased. “crazy paving sign” (white thin arrow) were  
452 seen.

453

454

455 **FIGURE 3.** A-C. Chest CT of a 44 years old male. The clinical manifestations were

456 fever (38.5 °C), cough, dizziness and headache. C-reactive protein increased. “spider

457 web sign” (white thin arrow) were seen. **Figure 1 a-b.** Chest CT of a 38 year old man

458 with 2019-neov infection. Ground glass opacity (GGO) (white triangle), consolidation

459 (white thick arrow) and interlobular septal thickening (white thin arrow) distributed

460 under the pleura are seen.

461 **Figure 2 a-b.** Chest CT of a 60 year old man with 2019-neov infection. “crazy paving

462 sign” (white thin arrow) are seen.

463 **Figure 3 a-b.** Chest CT of a 44 year old man with 2019-neov infection “spider web

464 sign” (white thin arrow) are seen.

465

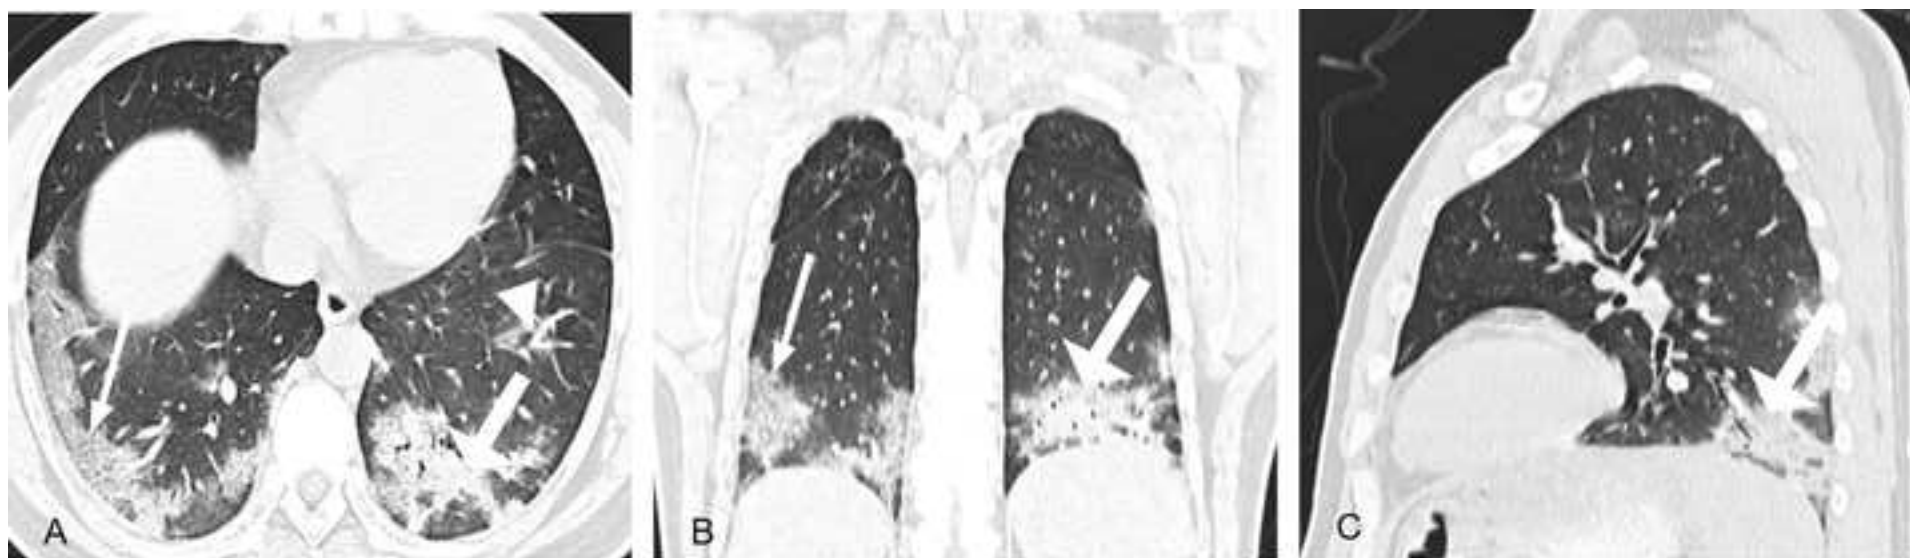

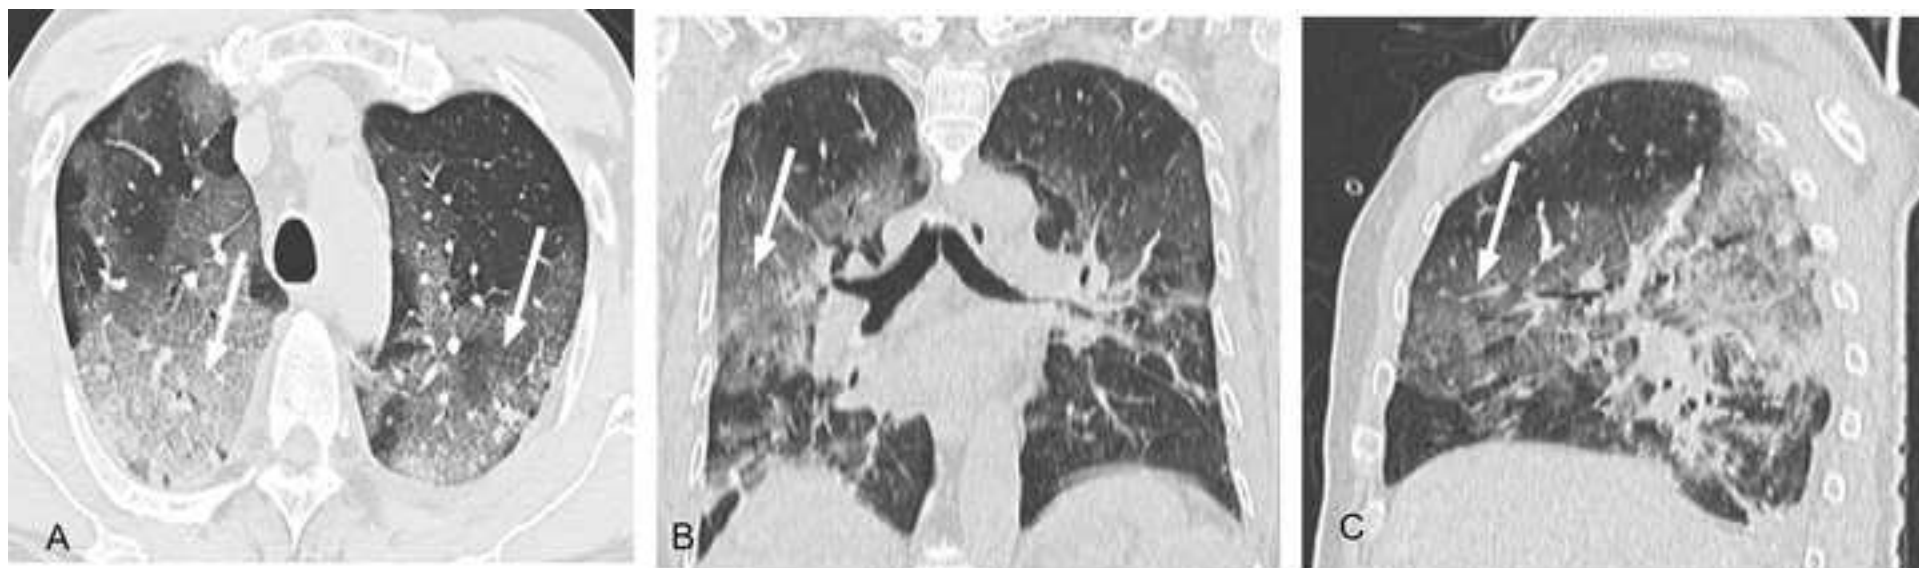

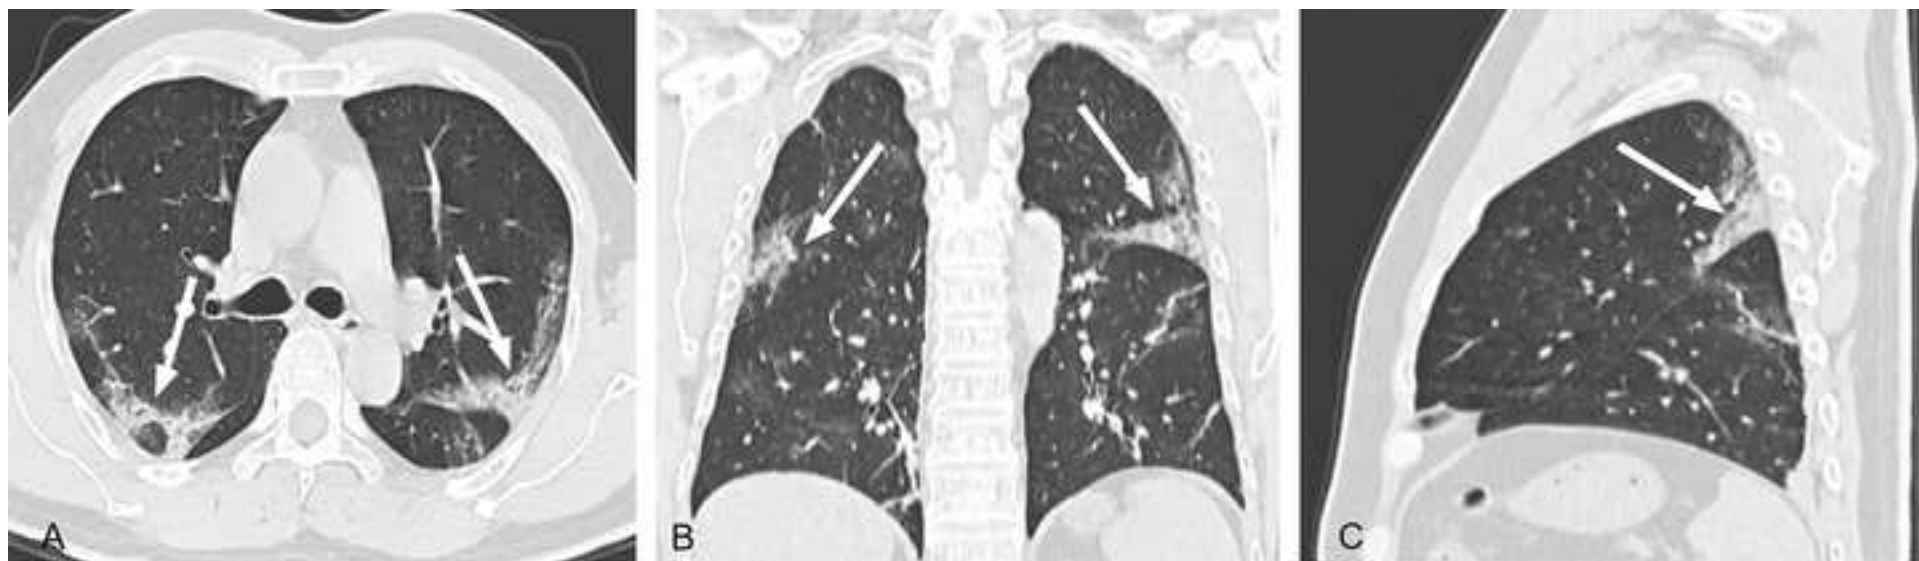

1 Chest CT Findings in Patients with Corona Virus Disease 2019  
2 and its Relationship with Clinical Features

3

4 **Abstract**

5 **Objectives:** To investigate the chest computed tomography (CT) findings in patients  
6 with confirmed corona virus disease 2019 (COVID-19) and to evaluate its  
7 relationship with clinical features.

8 **Materials and Methods:** Study sample consisted of 80 patients diagnosed as  
9 COVID-19 from January to February 2020. The chest CT images and clinical data  
10 were reviewed and the relationship between them was analyzed.

11 **Results:** Totally 80 patients diagnosed with COVID-19 were included. With regards  
12 to the clinical manifestations, 58/80 (73%) of patients had cough, 61/80 (76%) of  
13 patients had high temperature levels. The most frequent CT abnormalities observed  
14 were ground glass opacity (GGO) (73/80 cases, 91%), consolidation (50/80 cases,  
15 63%) and interlobular septal thickening (47/80, 59%). Most of the lesions were  
16 multiple, with an average of  $12 \pm 6$  lung segments involved. The most common  
17 involved lung segments were the dorsal segment of the right lower lobe (69/80, 86%),  
18 the posterior basal segment of the right lower lobe (68/80, 85%), the lateral basal  
19 segment of the right lower lobe (64/80, 80%), the dorsal segment of the left lower  
20 lobe (61/80, 76%) and the posterior basal segment of the left lower lobe (65/80, 81%).  
21 The average pulmonary inflammation index (PII) value was ( $34\% \pm 20\%$ ) for all the  
22 patients. Correlation analysis showed that the PII value was significantly correlated

23 with the values of lymphocyte count, monocyte count, C-reactive protein,  
24 procalcitonin, days from illness onset and body temperature ( $p < 0.05$ ).

25 **Conclusion:** The common chest CT findings of COVID-19 are multiple GGO,  
26 consolidation and interlobular septal thickening in both lungs, which are mostly  
27 distributed under the pleura. There are significant correlations between the degree of  
28 pulmonary inflammation and the main clinical symptoms and laboratory results. CT  
29 plays an important role in the diagnosis and evaluation of this emerging global health  
30 emergency.

31 **Key words:** SARS-CoV-2, COVID-19, Infection, Pneumonia, Chest CT

32

## 33 **Introduction**

34 Since the middle of December 2019, many cases of pneumonia with unidentified  
35 causes have been found in some hospitals in Wuhan City, Hubei Province, China.<sup>1</sup> At  
36 first, it was reported that a number of patients had certain contact with a large seafood  
37 and animal market, which suggested an animal-to-human transmission. Soon  
38 afterwards, an increasing number of patients without being exposed to the animal  
39 market started to grow exponentially, indicating a fact of human-to-human  
40 transmission. At present, this kind of pneumonia has been confirmed as a new type of  
41 acute respiratory infectious disease caused by coronavirus infection.<sup>2,3</sup> However, it is  
42 not clear how expeditiously and sustainably the virus spreads from person to person.  
43 On 12 February, 2020, the International Committee on Taxonomy of Viruses (ICTV)

44 announced that the official classification of the new coronavirus was severe acute  
45 respiratory syndrome coronavirus 2 (SARS-CoV-2). The same day, the World Health  
46 Organization (WHO) announced that the official name of the disease caused by the  
47 virus was corona virus disease 2019 (COVID-19). The Corona Virus has been  
48 spreading rapidly around the world, infecting no fewer than seventy thousands people,  
49 and leading to a certain degree of public panic.<sup>4-6</sup> On January 30, 2020, the  
50 International Health Regulations Emergency Committee of the WHO declared the  
51 outbreak a “public health emergency of international concern” (PHEIC).  
52 The epidemic caused by the new coronavirus has become a public health emergency  
53 of international concern.

54 The SARS-CoV-2 is a new strain of coronavirus which has never been found in  
55 human body before. Common clinical symptoms of patients infected with  
56 SARS-CoV-2 include fever fatigue and dry cough. Besides, a small number of  
57 patients could have nasal congestion, runny nose, sore throat or diarrhea. Furthermore,  
58 in some aggravated cases, infection has led to severe acute respiratory syndrome,  
59 renal failure, and even death. In severe cases patients present with dyspnea and / or  
60 hypoxemia one week after the onset of the disease, and develop rapidly into acute  
61 respiratory distress syndrome, septic shock, metabolic acidosis and coagulation  
62 dysfunction which are hard to correct. Up to the present there is only limited data  
63 available regarding the typical chest CT imaging findings in COVID-19. In this study,  
64 we retrospectively evaluated the chest CT findings in 80 patients with confirmed  
65 COVID-19 and evaluate their relationship with the clinical features.



66

## 67 **Materials and Methods**

### 68 **Patients**

69 The present study sample consisted of 80 patients who had been diagnosed as  
70 COVID-19 in our hospitals (outside of the Wuhan area) from January to February  
71 2020. This study received Ethics Committee approval of our institutions, and the  
72 committees waived the need for individual consent due to the retrospective nature of  
73 the study. The inclusion criteria were: 1. epidemiological history -either  
74 travel/residence history in Wuhan or exposure history to fevered patients from Wuhan  
75 suffering from respiratory symptoms within 14 days before the onset of illness; 2.  
76 laboratory diagnosis - 1) real-time fluorescence polymerase chain reaction revealed  
77 positive detection of SARS-CoV-2 in throat swabs or lower respiratory tract; 2) the  
78 virus gene sequencing of respiratory or blood samples is highly homologous with the  
79 known SARS-CoV-2. All the patients underwent thin-section CT at least one time.  
80 The exclusion criteria were another confirmed concomitant pulmonary pneumonia or  
81 coronavirus infection. Children and pregnant women were also excluded from this  
82 study

83 Clinical and laboratorial data were obtained from a detailed medical records  
84 collected respectively in standardized form by two radiologists with 10 and 8 years  
85 experience. The following clinical data of the patients were assessed: gender, age,  
86 cough, expectoration, chest pain, muscle ache, abdominal pain or diarrhea, pharyngeal  
87 discomfort, dyspnea, dizziness or headache, blood in sputum, and presence of

88 comorbidities (including systemic hypertension, diabetes mellitus, tobacco smoke,  
89 asthma, heart disease, chronic obstructive pulmonary disease (COPD),  
90 immunodeficiency, and others. Information regarding the physical examination at  
91 admission was also evaluated, including the heart rate (HR), body temperature,  
92 oxygen saturation, and blood pressure (BP). Moreover, the laboratory data obtained at  
93 admission, which included the leukocyte, lymphocyte, neutrophil, monocyte,  
94 procalcitonin, and C-reactive protein (CRP), were assessed as well. Blood gas analyses  
95 were performed in 40 patients whose PH value, PaCO<sub>2</sub> and PaO<sub>2</sub> were also assessed.  
96 All the blood gas analysis was conducted from arterial blood samples.

97

#### 98 **CT scans and Review**

99 The CT examinations were carried out with an 16-row multidetector CT scanner  
100 (Siemens Somatom Sensation; Siemens, Erlangen, Germany) using the following  
101 parameters: 120 kVp, 150 mA, 1.5 mm collimation, 1.35:1 pitch, sharp kernel (B80f),  
102 reconstruction matrix of 512×512, slice thickness of 1.0mm, and high spatial  
103 resolution algorithm. All the patients were scanned in a supine position during  
104 breath-holding at full inspiration. All CT images were evaluated using a lung window,  
105 with a window level of -500 HU and window width of 1500 HU. Two certificated  
106 chest radiologists with 10 and 8 years experience independently reviewed the CT  
107 images while they were blinded to the names and clinical data of the patients. The CT  
108 imaging features were fully assessed and the following findings were highlighted:  
109 ground glass opacity (GGO), consolidation, interlobular septal thickening, bronchial

110 wall thickening, subpleural line, lymph node enlargement, pleural effusion and  
111 pericardial effusion in accordance with the standard morphologic descriptors based on  
112 the Fleischner Society Nomenclature Committee recommendations and similar  
113 studies.<sup>7,8</sup> As a rule, a consensus had to be reached between the 2 radiologists about  
114 the abnormalities, and discrepancies were reconciled and tackled via discussion.  
115 Specifically, the evaluation of the size and extent of lung involvement was based on the  
116 segments of the lung anatomy: 10 segments in the right lung and 10 segments in the  
117 left lung (2 segments were considered in the apicoposterior segment of the left upper  
118 lobe and 2 segments were considered in the inferior front segment of the left lower  
119 lobe). According to the evaluation criterion established by Chongqing Radiologist  
120 Association of China, the pulmonary inflammation index (PII) was obtained from  
121 each patient.  $PII = (Distribution\ score + Size\ score) / 40 * 100\%$  (Fig.1). Distribution  
122 score: scored according to the lesion distribution, one score for each lung segment,  
123 and 20 scores for left and right lung. Lesion size score: scored according to whether  
124 the lesion occupied more than 50% of the lung segment volume, one score for  $\geq 50\%$ ,  
125 and zero score for  $< 50\%$ . Spearman's correlations were performed to evaluate the  
126 relationships between the PII value and the clinical symptom and laboratory results of  
127 the patients. All Statistical Analysis was conducted using Statistical Package for  
128 Social Sciences software version 23.0 (SPSS Inc., Chicago, IL, USA). P values less  
129 than 0.05 were considered statistically significant.

130

131 **Results :**

132 **Characteristics and clinical manifestations**

133 This study included 80 patients diagnosed as COVID-19, of which 42 were male  
134 (52%) and 38 were female (48%). All the patients aged 15-79 years with an average  
135 age of  $44 \pm 11$  years. 26/80 (33%) of patients were smokers. 61/80 (76%) of patients  
136 had high temperature levels. 15/80 (18%) of patients had comorbidities, 4/80 (5%) of  
137 patients had hypertension, 4/80 (5%) of patients had diabetes, 3/80 (4%) of patients  
138 had COPD, 3/80 (3%) of patients had immunosuppression (immunosuppressive drugs  
139 taking), 1/80 (1%) of patients had heart disease (coronary heart disease). No patients  
140 had asthma or other chronic lung disease. With regards to the clinical manifestations,  
141 58/80 (73%) of patients had cough, 11/80 (14%) of patients had expectoration, 5/80  
142 (6%) of patients had chest pain, 13/80 (16%) of patients had muscle ache, 7/80 (9%)  
143 of patients had abdominal pain or diarrhea, 9/80 (11%) of patients had pharyngeal  
144 discomfort, 8/80 (10%) of patients had dizziness or headache, 7/80 (9%) of patients  
145 had dyspnea and 3/80 of patients (4%) had blood in sputum. On physical examination  
146 stastics, the median oxygen saturation was 97% (IQR: 96%-98%), the average heart  
147 rate was  $88.24 \pm 11.67$  bpm and the respiratory rate was  $21.05 \pm 3.74$  breaths/min.  
148 The average systolic BP was  $123.46 \pm 14.19$  mmHg, and the diastolic BP was  $80.00 \pm$   
149  $14.04$  mmHg. Regarding the laboratory data, the median leukocyte count was 5.40  
150 (IQR: 4.20-6.95) ( $\times 10^9/L$ ), lymphocyte count was 1.15 (IQR: 0.76-1.40) ( $\times 10^9/L$ ),  
151 monocyte count was 0.41 (IQR: 0.27-0.53) ( $\times 10^9/L$ ), neutrophil count was 3.74 (IQR:  
152 2.67-5.20) ( $\times 10^9/L$ ), respectively. The median C-reactive protein was 12.39 (IQR:  
153 2.71-50.60) (mg/L) and the procalcitonin was 0.04 (IQR: 0.03-0.07) (ng/mL). Blood

154 gas analysis were performed in 40 patients. The average PH value was  $7.45 \pm 0.02$ ,  
155  $\text{PaCO}_2$  (mmHg) was  $39.21 \pm 7.25$ , and  $\text{PaO}_2$  (mmHg) was  $85.72 \pm 22.11$ . The clinical  
156 manifestations and laboratory findings were shown in Table 1 and 2.

157

### 158 **Chest CT findings**

159 All patients were examined by chest CT  $7 \pm 4$  days after the onset of disease. In chest  
160 CT images, 76/80 cases (95%) of the patients had abnormalities indicating the  
161 pneumonia. The major CT abnormalities observed were GGO (ground glass opacity)  
162 (73/80 cases, 91%), consolidation (50/80 cases, 63%) and interlobular septal  
163 thickening (47/80, 59%) (Fig. 1). Besides that, 9/80 (11%) of patients had bronchial  
164 wall thickening, 16/80 (20%) of patients had subpleural line, 5/80 (6%) of patients  
165 had pleural effusion, 3/80 (4%) of patients had lymph node enlargement, 4/80 (5%) of  
166 patients had pericardial effusion. The characteristic signs were “crazy paving sign”  
167 (23/80, 29%) and “spider web sign” (20/80, 25%) (Fig. 2, 3). The “crazy paving  
168 pattern” was characterized by the reticular interlobular septa thickening within the  
169 patchy GGO, which had been reported in Severe Acute Respiratory Syndrome (SARS)  
170 literatures.<sup>9,10</sup> The “spider web sign” was the first time we found and named it. It  
171 showed a triangular or angular GGO under the pleura with the internal interlobular  
172 septa thickened like a net. The adjacent pleura was pulled and formed a  
173 spiderweb-like shape in the corner. Most of the lesions were multiple, with an average  
174 of  $12 \pm 6$  lung segments involved. The lesions showed subpleural distribution in 42/80  
175 cases (53%), diffuse distribution in 7/80 cases (9%), peribronchial distribution in 3/80

176 cases (4%) and mixed distribution in 24/80 cases (30%). The most common involved  
177 lung segments were the dorsal segment of the right lower lobe (69/80, 86%), the  
178 posterior basal segment of the right lower lobe (68/80, 85%), the lateral basal segment  
179 of the right lower lobe (64/80, 80%), the dorsal segment of the left lower lobe  
180 (61/80,76%) and the posterior basal segment of the left lower lobe (65,81%). The  
181 average PII value was (34% ±20%) for all the patients. Correlation analysis showed  
182 that the PII value was significantly correlated with the values of lymphocyte count,  
183 monocyte count, C-reactive protein, procalcitonin, days from illness onset and body  
184 temperature (continuous variable) (p<0.05). The correlation coefficient values were  
185 -.260, -.258, .373, .273, .287, .544 respectively. The chest CT findings of the patients  
186 were shown in Table 3.

187

## 188 **Discussion**

189 COVID-19, which is primarily transmitted by contact between people and droplets,  
190 turns out to be a new disease of human beings. Whether the novel coronavirus can  
191 spread in other ways is unclear, although it could be detected in nasopharyngeal  
192 swabs, sputum, lower respiratory secretions, blood, feces and other samples. Early  
193 identification and early intervention are vital to reduce the incidence and mortality of  
194 severe cases. In this study, most patients were adults and there was no significant  
195 difference between the numbers of either male or female. Cough and fever were the  
196 most common clinical symptoms. The incidence of expectoration, chest pain, muscle

197 ache, abdominal pain or diarrhea, pharyngeal discomfort, headache or dizziness and  
198 dyspnea were less common. This is similar to other types of coronavirus infections  
199 such as the SARS and Middle East Respiratory Syndrome (MERS).<sup>11-13</sup> This implies  
200 that they can presumably be classified as the same kind of infection and the target cells  
201 of SARS-CoV-2 may also be located in the lower respiratory tract.

202 For chest CT, 76 cases (95%) had abnormalities indicating the pneumonia. On the  
203 whole, in comparison with other types of pneumonia, COVID-19 seemed to cause  
204 milder symptoms and severer pulmonary changes on CT. Most of the patients had  
205 mild symptoms and mild temperature rise, but their lung manifestations were serious.  
206 Multiple lesions were found in multiple segments and lobes of both lungs, which was  
207 different from the bacterial pneumonia. In other words, multiple and large lesions of  
208 two lungs involved simultaneously is not generally spotted in the typical bacterial  
209 pneumonia.<sup>14,15</sup> The most common involved lung segments were the dorsal segment  
210 of the right lower lobe, the posterior basal segment of the right lower lobe, the lateral  
211 basal segment of the right lower lobe, the dorsal segment of the left lower lobe and  
212 the posterior basal segment of the left lower lobe. There were significant correlations  
213 among the degree of pulmonary inflammation and the main clinical symptoms and  
214 laboratory results. Our results suggested that chest CT could be used to evaluate the  
215 severity of the disease and played an important role in clinical practice. For CT  
216 features, GGO was the most common of all the abnormalities, followed by  
217 consolidation and interlobular septal thickening. This is consistent with the results of  
218 the recently published studies.<sup>16-18</sup> Occasionally the subpleural line and bronchial wall

219 thickening could be seen whereas pleura effusion, pericardial effusion or lymph node  
220 enlargement were rare to identify. Some of the GGO was characterized by the  
221 reticular interlobular septa thickening, which was called "crazy paving pattern". It  
222 resulted from the alveolar edema and interstitial inflammatory of acute lung injury,  
223 which had been reported in SARS.<sup>9,10</sup> In another situation, some of the GGO showed  
224 a triangular or angular shape under the pleura with the internal interlobular septa  
225 thickened like a net. The adjacent pleura was pulled and formed a spiderweb-like  
226 shape in the corner. Thus we named it "spider web sign". But the pathological basis  
227 needs further pathological confirmation. It is a specific sign for COVID-19, which has  
228 not been reported in other diseases in the literature. At present, it is not clear whether  
229 it has clinical value in evaluating the prognosis of patients. Recently, Pan et al have  
230 analyzed the time course of lung changes in 21 mild patients with confirmed  
231 COVID-19. They found that the initial lung manifestation was subpleural GGO which  
232 turned to consolidation two weeks after the onset of the disease, and then the lesions  
233 were gradually absorbed, leaving a wide range of GGO and subpleural parenchymal  
234 bands.<sup>17</sup> In another article, the authors found that after 7 days of treatment for the mild  
235 patients, there was a significant reduction in GGO on chest CT. On the 13th day after  
236 admission, most of the ground glass disappeared. Our patients constituted a complete  
237 group with mild, severe and critical types.<sup>19</sup> All patients completed CT examination  
238 within two days after admission, which was  $7 \pm 4$  days from the onset of the  
239 disease.

240 At present, to our knowledge, all patients have not been examined by pathology



241 in the world, so it is impossible to know the exact pathological manifestations of  
242 COVID-19. However, according to the morphological changes of the CT features,  
243 pathological manifestations could be speculated although there was no direct evidence.  
244 The ground glass density lesions could be caused by the exudation of alveoli. The  
245 appearance of consolidation indicated that the alveoli were completely filled by  
246 inflammatory exudation. The thickening of interlobular septum indicated that the  
247 pulmonary interstitium has been involved. In the late stage of acute respiratory  
248 distress syndrome, diffuse alveolar and interstitium damage may occur.

249 The COVID-19 needs to be differentiated from other diseases, such as SARS and  
250 MERS. They all showed multiple ground glass shadows and solid lesions in both  
251 lungs, mainly distributed under the pleura, which were difficult to distinguish.<sup>20-22</sup>  
252 However, SARS and MERS had faster disease progress and heavier lung damages  
253 than COVID-19 infection did. Likewise, COVID-19 should be distinguished from  
254 other kinds of viral pneumonia such as influenza virus, parainfluenza virus,  
255 adenovirus, respiratory syncytial virus, rhinovirus, human metapneumovirus and  
256 mycoplasma pneumonia.

257 In conclusion, in this study, we found that common chest CT findings in  
258 COVID-19 include multiple GGO, consolidation and interlobular septal thickening in  
259 both lungs, with mostly subpleural distribution. There were significant correlations  
260 among the degree of pulmonary inflammation and the main clinical symptoms and  
261 laboratory results. CT played an important role in the diagnosis and evaluation of this  
262 emerging global health emergency. Nevertheless, this study has three limitations. First

263 of all, this was a retrospective study involving a small number of patients with proven  
264 SARS-CoV-2 infection. Secondly, none of the patients had a lung biopsy or autopsy  
265 to reflect the histopathological changes. Thirdly, this study was a cross-sectional  
266 study and we could not analyze the dynamic CT changes in different stages. In the  
267 future work we will investigate the chest CT features of differential stages of  
268 COVID-19 by using larger, more diverse samples.

269

## 270 **Reference**

- 271 1. WHO. Novel coronavirus - China. Jan 12, 2020. Available at:  
272 <https://www.who.int/csr/don/12-january-2020-novel-coronavirus-china/en/>.
- 273 2. Chaolin H, Yeming W, Xingwang L, et al. *The lancet*, Published Online January  
274 24, 2020. [https://doi.org/10.1016/S0140-6736\(20\)30183-5](https://doi.org/10.1016/S0140-6736(20)30183-5).
- 275 3. Huang C, Wang Y, Li X, et al. Clinical features of patients infected with 2019  
276 novel coronavirus in Wuhan, China. *Lancet*, 2020. doi:  
277 10.1016/S0140-6736(20)30183-5.
- 278 4. WHO. Novel coronavirus - Japan (ex-China). Jan 17, 2020. Available at:  
279 <http://www.who.int/csr/don/17-january-2020-novel-coronavirusjapan-ex-china/en>  
280 [/](http://www.who.int/csr/don/17-january-2020-novel-coronavirusjapan-ex-china/en).
- 281 5. WHO. Novel coronavirus - Republic of Korea (ex-China). Jan 21, 2020.  
282 Available at:  
283 <http://www.who.int/csr/don/21-january-2020-novelcoronavirus-republic-of-korea>  
284 [-ex-china/en/](http://www.who.int/csr/don/21-january-2020-novelcoronavirus-republic-of-korea) .

- 285 6. CDC. First travel-related case of 2019 novel coronavirus detected in United  
286 States. Jan 21, 2020. Available at:  
287 <https://www.cdc.gov/media/releases/2020/p0121-novel-coronavirus-travel-case.ht>  
288 [ml](https://www.cdc.gov/media/releases/2020/p0121-novel-coronavirus-travel-case.ht).
- 289 7. Hansell DM, Bankier AA, MacMahon H, et al. Fleischner Society: glossary of  
290 terms for thoracic imaging. *Radiology*. 2008; 246: 697-722.
- 291 8. Karla S, Natally H, et al. Spectrum of clinical and radiographic findings in  
292 patients with diagnosis of H1N1 and correlation with clinical severity. *BMC*  
293 *Infect Dis*. 2019; 19: 964.
- 294 9. Ketai L, Paul NS, Wong KT. Radiology of Severe Acute Respiratory Syndrome  
295 (SARS): the Emerging Pathologic-Radiologic Correlates of an Emerging Disease.  
296 *J Thorac Imaging*. 2006; 21(4):276-283.
- 297 10. Wong KT, Antonio GE, Hui DS, et al. Thin-Section CT of Severe Acute  
298 Respiratory Syndrome: evaluation of 74 Patients Exposed to or with the Disease.  
299 *Radiology*. 2003; 228(2): 395-400.
- 300 11. Lee N, Hui D, Wu A, et al. A major outbreak of severe acute respiratory  
301 syndrome in Hong Kong. *N Engl J Med*. 2003; 348:1986-1994.
- 302 12. Assiri A, Al-Tawfiq JA, Al-Rabeeah AA, et al. Epidemiological, demographic,  
303 and clinical characteristics of 47 cases of Middle East respiratory syndrome  
304 coronavirus disease from Saudi Arabia: a descriptive study. *Lancet Infect Dis*.  
305 2013; 13: 752-761.
- 306 13. Muller NL, Ooi GC, Khong PL, et al. High-resolution CT findings of severe

- 307 acute respiratory syndrome at presentation and after admission. *Am J*  
308 *Roentgenol.* 2004; 182:39-44.
- 309 14. Gharib AM, Stern E. Radiology of pneumonia. *Medical Clinics of North*  
310 *America.* 2001; 85: 1461-1491.
- 311 15. Koo HJ, Lim S, Choe J, et al. Radiographic and CT Features of Viral Pneumonia.  
312 *Radiographics.* 2018; 38:719-739.
- 313 16. Song FX, Shi NN, Zhang ZY, et al. Emerging Coronavirus 2019-nCoV  
314 Pneumonia. *Radiology.* 2020:200274. doi:10.1148/radiol.2020200274.
- 315 17. Pan F, Yan TH, Sun P, et al. Time Course of Lung Changes On Chest CT During  
316 Recovery From 2019 Novel Coronavirus (COVID-19) Pneumonia. *Radiology.*  
317 2020:200370. doi:10.1148/radiol.2020200370.
- 318 18. Jeffrey K. Chest CT Findings in 2019 Novel Coronavirus (2019-nCoV) Infections  
319 from Wuhan, China: Key Points for the Radiologist. *Radiology.* 2020:200241.  
320 doi:10.1148/radiol.2020200241.
- 321 19. Duan YN, Qin J. Pre- and Posttreatment Chest CT Findings: 2019 Novel  
322 Coronavirus (2019-nCoV) Pneumonia. *Radiology.* 2020:200323.  
323 doi:10.1148/radiol.2020200323.
- 324 20. Das KM, Lee EY, Enani MA, et al.  
325 CT correlation with out- comes in 15 patients with acute Middle  
326 East respiratory syndrome coronavirus. *AJR.* 2015; 204: 736-742.
- 327 21. Ajlan AM, Ahyad RA, Jamjoom LG, et al. Middle East Respiratory Syndrome  
328 Coronavirus (MERS-CoV) Infection: Chest CT Findings. *AJR.* 2014; 203:

329 782-787.

330 22. Hui DS, Memish ZA, Zumla A. Severe acute respiratory syndrome vs. the Middle  
331 East respiratory syndrome. *Curr Opin Pulm Med.* 2014; 20: 233-421.

332

333

334

335

336

337

338

339

340

341

342

343

344

345

346

347

348

349

350

351

352 Table 1: Characteristics and clinical manifestations of the 80 patients with COVID-19.

|                           | <b>Patients (n=80)</b> |
|---------------------------|------------------------|
| <b>Characteristics</b>    |                        |
| Age, years                | 44 (11)                |
| Sex                       |                        |
| Female                    | 38 (48%)               |
| Male                      | 42 (52%)               |
| Smokers                   | 26 (33%)               |
| Days from illness onset   | 7 (4)                  |
| Comorbidity               | 15 (18%)               |
| Hypertension              | 4 (5%)                 |
| Diabetes                  | 4 (5%)                 |
| COPD                      | 3 (4%)                 |
| Immunosuppression         | 3 (3%)                 |
| Heart disease             | 1 (1%)                 |
| Asthma                    | 0 (0%)                 |
| <b>Signs and symptoms</b> |                        |
| Fever                     | 61 (76%)               |
| Highest temperature, °C   | 37.80 (37.30-38.20)    |
| <37.30                    | 19 (24%)               |
| 37.30–38.00               | 38 (47%)               |
| 38.10–39.00               | 20 (25%)               |

|                             |          |
|-----------------------------|----------|
| >39.00                      | 3 (4%)   |
| Cough                       | 58 (73%) |
| Expectoration               | 11 (14%) |
| Chest pain                  | 5 (6%)   |
| Muscle ache                 | 13 (16%) |
| Dyspnoea                    | 7 (9%)   |
| Abdominal pain and diarrhea | 7 (9%)   |
| Pharyngeal discomfort       | 9 (11%)  |
| Dizziness and headache      | 8 (10%)  |
| Blood in sputum             | 3 (4%)   |

---

353 Data are n (%), n/N (%), mean (SD), where N is the total number of patients with  
354 available data. COVID-19 = Corona Virus Disease 2019 . COPD = Chronic  
355 obstructive pulmonary disease.

356

357

358

359

360

361

362

363

364

365 Table 2: Laboratory and physical examination results of the 80 patients with  
 366 COVID-19.

|                                         | <b>Patients (n=80)</b> |
|-----------------------------------------|------------------------|
| White blood cell count, $\times 10^9/L$ | 5.40 (4.20-6.95)       |
| Increased                               | 10 (10%)               |
| Decreased                               | 7 (9%)                 |
| Neutrophil count, $\times 10^9/L$       | 3.74 (2.67-5.20)       |
| Increased                               | 16 (20%)               |
| Decreased                               | 5 (6%)                 |
| Lymphocyte count, $\times 10^9/L$       | 1.15 (0.76-1.40)       |
| Decreased                               | 34 (43%)               |
| Monocyte count, $\times 10^9/L$         | 0.41 (0.27-0.53)       |
| Increased                               | 8 (10%)                |
| Decreased                               | 1 (1%)                 |
| C-reactive protein (mg/L)               | 12.39 (2.71-50.61)     |
| Increased                               | 37 (46%)               |
| Procalcitonin (ng/mL)                   | 0.04 (0.03-0.07)       |
| Increased                               | 32 (40%)               |
| Heart rate (bpm)                        | 88.24 (11.67)          |
| Respiratory rate (breaths/min)          | 21.05 (3.74)           |
| Systolic pressure (mm Hg)               | 123.46 (14.19)         |
| Diastolic pressure (mm Hg)              | 80.00 (14.04)          |



|                               |               |
|-------------------------------|---------------|
| SaO <sub>2</sub> , % room air | 97% (96%-98%) |
| PH value*                     | 7.45 (0.02)   |
| PaCO <sub>2</sub> (mmHg) *    | 39.21 (7.25)  |
| PaO <sub>2</sub> (mmHg) *     | 85.73 (22.11) |

---

367 Data are n (%), n/N (%), mean (SD) or and median (IQR), where N is the total  
368 number of patients with available data. Increasing means exceeding the upper limit of  
369 the normal range, and decreasing means being below the lower limit of the normal  
370 range. COVID-19= Corona Virus Disease 2019. SaO<sub>2</sub> = Arterial oxygen saturation.  
371 PH = Potential of hydrogen. PaCO<sub>2</sub> = Arterial partial pressure of carbon dioxide. PaO<sub>2</sub>  
372 = Arterial oxygen tension. \*Data available for 40 patients.

373

374

375

376

377

378

379

380

381

382

383

384

385 Table 3: Chest CT findings of the 80 patients with COVID-19.

|                                                 | <b>Patients (n=80)</b> |
|-------------------------------------------------|------------------------|
| <b>CT features</b>                              |                        |
| GGO                                             | 73 (91%)               |
| Consolidation                                   | 50 (63%)               |
| Interlobular septal thickening                  | 47 (59%)               |
| Crazy paving pattern                            | 23 (29%)               |
| Spider web sign                                 | 20 (25%)               |
| Subpleural line                                 | 16 (20%)               |
| Bronchial wall thickening                       | 9 (11%)                |
| Lymph node enlargement                          | 3 (4%)                 |
| Pericardial effusion                            | 4 (5%)                 |
| Pleural effusion                                | 5 (6%)                 |
| <b>Lung segment involved</b>                    |                        |
| Average lung segments involved                  | 12 (6)                 |
| Dorsal segment of the right lower lobe          | 69 (86%)               |
| Lateral basal segment of the right lower lobe   | 64 (80%)               |
| Posterior basal segment of the right lower lobe | 68 (85%)               |
| Dorsal segment of the left lower lobe           | 61 (76%)               |
| Posterior basal segment of the left lower lobe  | 65 (81%)               |
| PII value                                       | 34% (20%)              |
| <b>Distribution</b>                             | <b>76 (95%)</b>        |

|                            |          |
|----------------------------|----------|
| Subpleural distribution    | 42 (53%) |
| Diffuse distribution       | 7 (9%)   |
| Peribronchial distribution | 3 (4%)   |
| Mixed distribution         | 24 (30%) |

---

386 Data are n (%), n/N (%) or mean (SD), where N is the total number of patients with

387 available data. COVID-19= Corona Virus Disease 2019. GGO = ground glass opacity.

388 PII = pulmonary inflammation index.

389

390

391

392 **FIGURE 1.** A-C, Chest CT of a 38 years old male. The clinical manifestations were  
393 fever (38 °C), cough, expectoration, muscle pain and dyspnea. C-reactive protein and  
394 procalcitonin increased. Ground glass opacity (GGO) (white triangle), consolidation  
395 (white thick arrow) and interlobular septal thickening (white thin arrow) distributed  
396 under the pleura were seen. Nine lung segments including the lateral basal segment,  
397 posterior basal segment, posterior basal segment, anterior basal segment of the both  
398 lower lobe, and the dorsal segment of the left inferior lobe were involved. In three  
399 segments the lesions occupied more than 50% of the total volume. PII= (9+3)/40  
400 \*100%=30%.

401

402 **FIGURE 2.** A-C, Chest CT of a 60 years old male. The clinical manifestations were  
403 fever (37.8 °C), cough, expectoration and dyspnea. Neutrophil count, lymphocyte  
404 count and C-reactive protein increased. “crazy paving sign” (white thin arrow) were  
405 seen.  
406

407 **FIGURE 3.** A-C, Chest CT of a 44 years old male. The clinical manifestations were  
408 fever (38.5 °C), cough, dizziness and headache. C-reactive protein increased. “spider  
409 web sign” (white thin arrow) were seen.
